# Supplementary material
Source: Springer Nature journal article supplement (https://www.springermedizin.de/resource/supplementary/13054_2012_620_MOESM5_ESM.pdf/9708856)

EVWL<sub>VolumeView</sub> vs. EVWL<sub>PiCCO</sub>

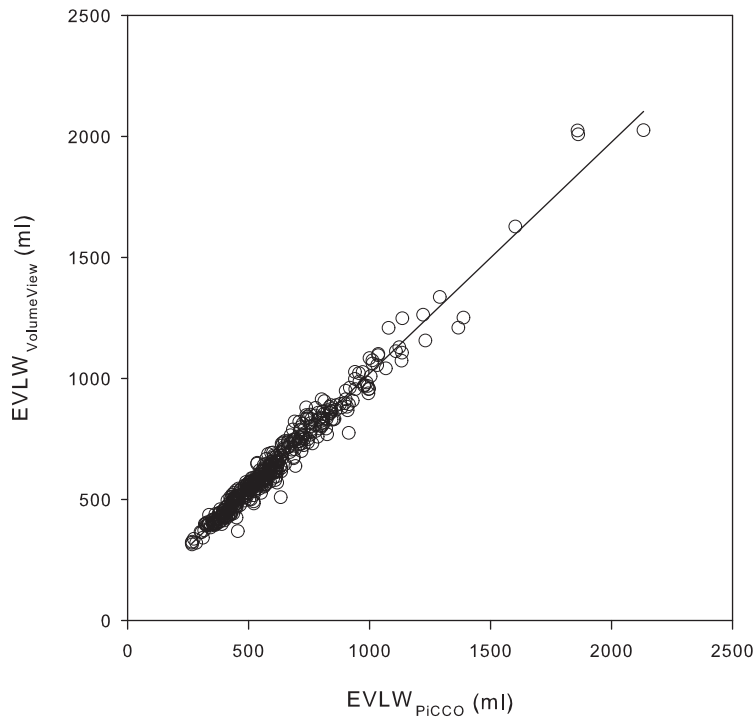

Bland Altman Plot EVLW

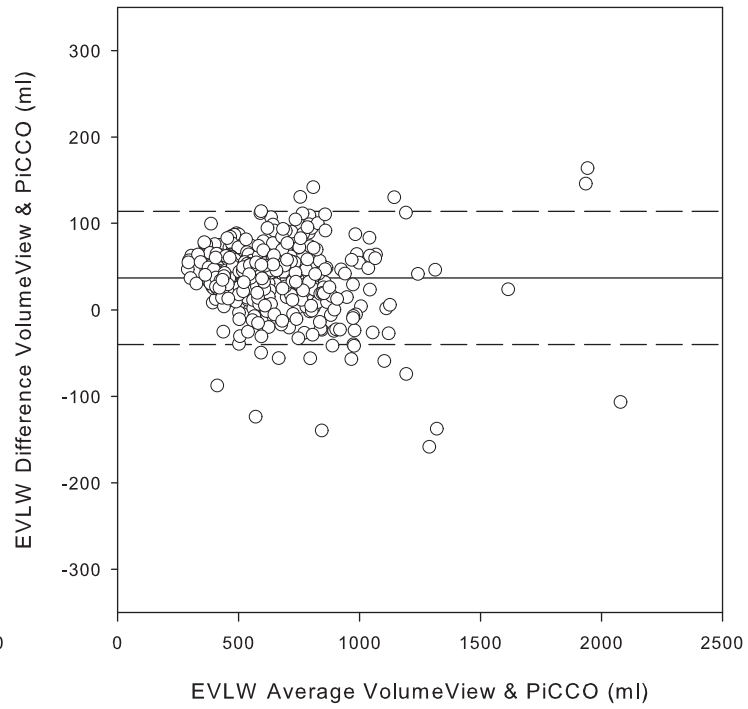

% Change GEDV (10% exclusion zone)

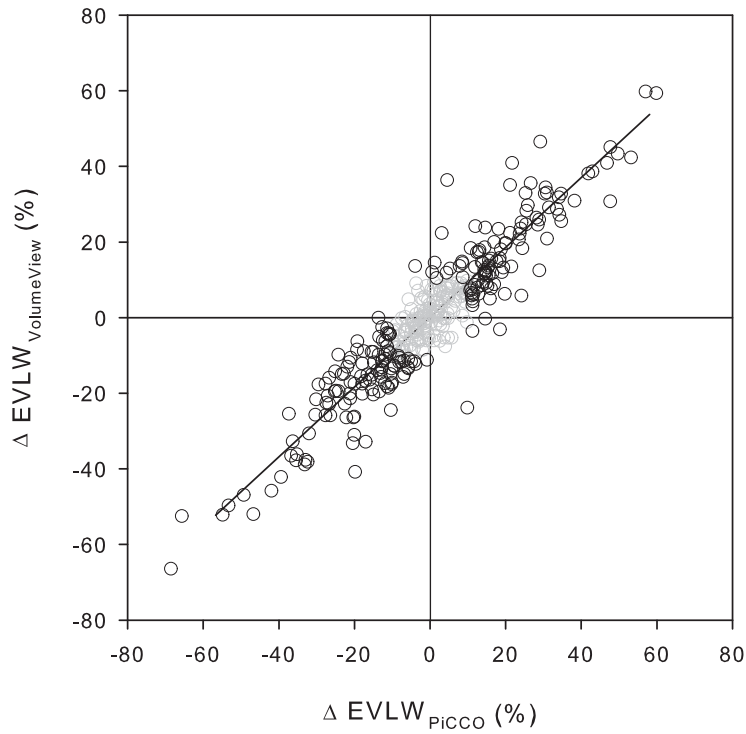

Polar Plot % Change EVLW

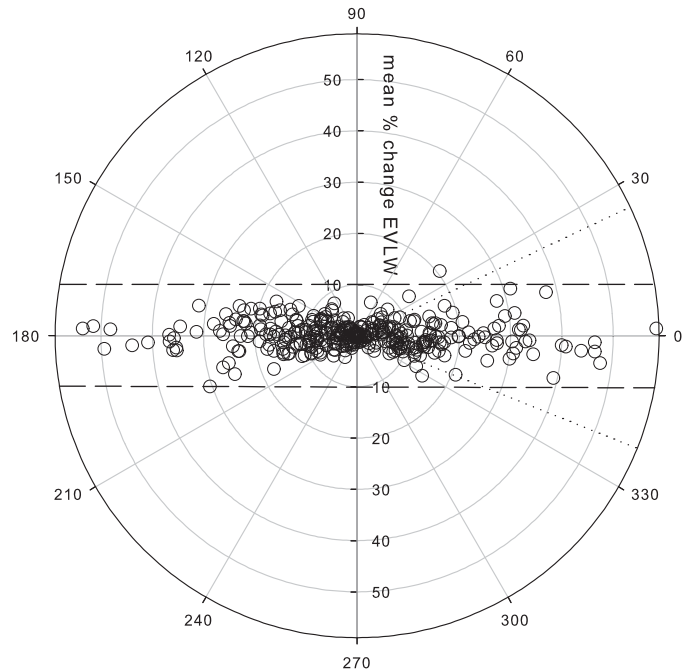

Supplement: MOESM5 [file 9708856]
